1 **Probing Specificities of Alcohol Acyltransferases for Designer Ester**  
2 **Biosynthesis with a High-Throughput Microbial Screening Platform**

3

4 Jong-Won Lee<sup>1,2</sup>, Hyeongmin Seo<sup>2,3</sup>, Caleb Young<sup>3</sup>, and Cong T. Trinh<sup>1,2,3,\*</sup>

5

6 <sup>1</sup>Bredesen Center for Interdisciplinary Research and Graduate Education, University of  
7 Tennessee, Knoxville, TN, USA

8 <sup>2</sup>Center for Bioenergy Innovation, Oak Ridge National Laboratory, Oak Ridge, TN, USA

9 <sup>3</sup>Department of Chemical and Biomolecular Engineering, University of Tennessee, Knoxville,  
10 TN, USA

11

12 \*Corresponding author. Email: [ctrinh@utk.edu](mailto:ctrinh@utk.edu)

13

14

15

16

17

18

19

20

## 21 **ABSTRACT**

22 Alcohol acyltransferases (AATs) enables microbial biosynthesis of a large space of esters by  
23 condensing an alcohol and an acyl CoA. However, substrate promiscuity of AATs prevents  
24 microbial biosynthesis of designer esters with high selectivity. Here, we developed a high-  
25 throughput microbial screening platform that facilitates rapid identification of AATs for  
26 designer ester biosynthesis. First, we established a microplate-based culturing technique with  
27 *in situ* fermentation and extraction of esters. We validated its capability in rapid profiling of  
28 the alcohol substrate specificity of 20 chloramphenicol acetyltransferase variants derived from  
29 *Staphylococcus aureus* (CAT<sub>Sa</sub>) for microbial biosynthesis of acetate esters with various  
30 exogeneous alcohol supply. By coupling the microplate-based culturing technique with a  
31 previously established colorimetric assay, we developed a high-throughput microbial screening  
32 platform for AATs. We demonstrated that this platform could not only confirm CAT<sub>Sa</sub> F97W  
33 with enhanced isobutyl acetate synthesis but also identify three ATF1<sub>Sc</sub> (P348M, P348A, and  
34 P348S) variants, derived from *Saccharomyces cerevisiae*'s AAT and engineered by model-  
35 guided protein design, for enhanced butyl acetate production. We anticipate the high-  
36 throughput microbial screening platform is a useful tool to identify novel AATs that have  
37 important roles in nature and industrial biocatalysis for designer bioester production.

38

### 39 **Keywords:**

40 High-throughput microbial screening; esters; isobutyl acetate; n-butyl acetate; ethyl acetate, 2-  
41 phenylethyl acetate; alcohol acetyltransferase; AAT; chloramphenicol acetyltransferase; CAT;  
42 *Escherichia coli*; solvent overlays; colorimetric assay; model-guided protein design.

43

## 44 1. INTRODUCTION

45 Esters are an important class of industrial chemicals with broad applications as flavors,  
46 fragrances, cosmetics, pharmaceuticals, green solvents, and advance biofuels (Lee and Trinh  
47 2020). Currently, esters are mainly produced by chemical synthesis from petroleum-based  
48 feedstocks that are neither renewable nor sustainable (Seo et al. 2019). Alternatively, microbial  
49 conversion has emerged as an alternative route for renewable and sustainable production of  
50 esters (Layton and Trinh 2014; Layton and Trinh 2016a; Layton and Trinh 2016b; Lee and  
51 Trinh 2019; Rodriguez et al. 2014; Tai et al. 2015b). Critical to the microbial biosynthesis of  
52 esters is the requirement of alcohol acyltransferases (AATs, EC 2.3.1.84) that catalyze a  
53 thermodynamically favorable condensation of an alcohol and acyl-CoA in an aqueous  
54 environment. Since esters are commonly found in nature such as fruits (e.g., apple (Li et al.  
55 2006; Souleyre et al. 2014; Souleyre et al. 2005), apricot (Gonzalez-Aguero et al. 2009), banana  
56 (Beekwilder et al. 2004), melon (El-Sharkawy et al. 2005; Lucchetta et al. 2007), papaya  
57 (Balbontin et al. 2010), and strawberry (Aharoni et al. 2000; Beekwilder et al. 2004; Cumplido-  
58 Laso et al. 2012; Gonzalez et al. 2009)) or yeast fermentation (Tai et al. 2015b; Verstrepen et  
59 al. 2003), various eukaryotic AATs have been identified and recently exploited for microbial  
60 biosynthesis of esters using synthetic biology and metabolic engineering approaches (Layton  
61 2014; Lee and Trinh 2018; Rodriguez et al. 2014; Tai et al. 2015a). Recent discovery and  
62 repurposing of prokaryotic chloramphenicol acetyltransferases (CATs, EC 2.3.1.28) to  
63 function as AATs have further expanded the library of ester-producing enzymes (Rodriguez et  
64 al. 2014; Seo et al. 2019). However, due to substrate promiscuity of these AAT/CAT enzymes,  
65 controllable microbial synthesis of designer esters with high selectivity remains a significant  
66 challenge (Layton and Trinh 2014; Lee and Trinh 2019).

67 Bioprospecting and protein engineering are promising strategies to find novel AATs  
68 with high specificity and activity toward a target ester. For instance, AAT of *Actinidia*

69 *chinensis* (AAT<sub>Ac</sub>) was engineered to create a AAT<sub>Ac</sub> S99G variant that enhanced butyl  
70 octanoate production in *Escherichia coli* about 4.5-fold higher than the wildtype (Chacon et al.  
71 2019). Similarly, Seo *et al.* reported that a single F97W mutation in CAT of the mesophilic  
72 *Staphylococcus aureus* (CAT<sub>Sa</sub>), identified by a model-guided protein design, achieved ~3.5-  
73 fold increase in isobutyl acetate (IBA) production in a thermophilic, cellulolytic bacterium  
74 *Clostridium thermocellum* (Seo et al. 2019). By combining both bioprospecting and model-  
75 guided protein engineering strategies, novel CATs have recently been discovered with  
76 improved efficiency, robustness, and compatibility (Seo et al. 2020). Even though research  
77 efforts in identifying beneficial AATs/CATs with high specificity and activities are promising,  
78 large space of novel AATs/CATs are still underexplored.

79 To access the specificities and activities of AATs/CATs directly, the enzymes need to  
80 be purified and characterized. Two colorimetric assays have been developed to determine  
81 AAT/CAT activities including the 5,5'-dithiobis-(2-nitrobenzoic acid) (DTNB) assay (Kruis et  
82 al. 2017; Seo et al. 2019; Tai et al. 2015b) and the  $\alpha$ -ketoglutarate dehydrogenase ( $\alpha$ -KGDH)-  
83 coupled assay (Knight et al. 2014; Lin et al. 2016). These assays are designed to quantify free  
84 CoAs released from the AAT/CAT esterification of alcohols and acyl-CoAs by measuring  
85 either the 412 nm absorbance of yellowish 5-thio-2-nitrobenzoic acid (TNB) for the DTNB  
86 assay or the 340 nm absorbance of nicotinamide adenine dinucleotide (NADH) for ( $\alpha$ -KGDH)-  
87 coupled assay. The key advantage of direct AAT/CAT measurement is that the assays can be  
88 performed in a high-throughput manner; however, some disadvantages for screening a large  
89 space of AATs/CATs include requirement of expensive acyl-CoA reagents and enzyme  
90 purification. Alternatively, direct measurement of esters for rapid, high-throughput screening  
91 of AAT/CAT specificities and activities *in vivo* can be attractive before determining the  
92 catalytic efficiencies in depth for promising enzyme candidates. Here, esters produced by  
93 microorganisms can be extracted with a solvent (e.g., hexane or hexadecane) and measured in

94 a separate step. While the conventional gas chromatography coupled with mass spectrometer  
95 (GC/MS) is accurate in identifying and quantifying esters, it is low-throughput and expensive.  
96 Fortunately, the colorimetric assay, based on the hydroxylamine/iron chemistry, can rapidly  
97 quantify esters in a high-throughput manner by first generating the ferric hydroxamate via the  
98 two steps of chemical reactions and then measuring its absorbance at 520 nm (Hill 1946; Lobs  
99 et al. 2016; Stern and Shapiro 1953; Wofford et al. 1986).

100 In this study, we aimed to develop a high-throughput microbial screening platform to  
101 identify novel AATs/CATs for designer ester biosynthesis in a simple, rapid, and efficient  
102 manner. We started by establishing a microplate-based culturing technique with *in situ*  
103 fermentation and extraction of esters. By coupling the microplate-based culturing technique  
104 with a modified colorimetric assay, we developed a high-throughput microbial screening  
105 platform to identify novel AATs. The platform can measure both esters and cell growth, which  
106 helps not only screen relative AATs/CATs specificities and activities rapidly but also evaluate  
107 the effect of expressing these enzymes on microbial health. We validated the developed high-  
108 throughput microbial screening platform by probing the alcohol substrate preference of 20  
109 engineered CAT F97 variants and identifying beneficial enzyme mutants from a library of  
110 ATF1<sub>sc</sub>, generated by model-guided protein design, for enhanced butyl acetate production. We  
111 anticipate the high-throughput microbial screening platform is a useful tool to identify novel  
112 AATs that have important roles in nature and industrial biocatalysis for designer bioester  
113 production.

114

## 115 **2. MATERIALS AND METHODS**

116 **2.1 Strains and plasmids.** Strains and plasmids used in this study are listed in Table 1. *E. coli*  
117 TOP10 was used for molecular cloning while BL21 (DE3) or EcDL002 (Layton and Trinh  
118 2014) was used as a host strain for ester production. The pETDuet-1 plasmids containing 20

119 F97 variants of CAT<sub>sa</sub> were used to examine the role of the F97 residue on the alcohol substrate  
120 preference. The plasmid pATF1<sub>sc</sub> was constructed by subcloning *ATF1<sub>sc</sub>* gene from pDL004  
121 (Layton and Trinh 2016a) into pET29 by the Gibson gene assembly method (Gibson et al.  
122 2009). The ATF1<sub>sc</sub> variants were generated by site-directed mutagenesis (Zheng et al. 2004).  
123 All the constructed plasmids were introduced into the host strains by chemical transformation.  
124 The primers used in this study are listed in Table S1. The alphabets annotate the amino acid  
125 variants, including: R, arginine; H, histidine; K, lysine; D, aspartic acid; E, glutamic acid; S,  
126 serine; T, threonine; N, asparagine; Q, glutamine; C, cysteine; G, glycine; Y, tyrosine; P,  
127 proline; A, alanine; V, valine; I, isoleucine; L, leucine; M, methionine; F, phenylalanine; and  
128 W, tryptophan.

129

130 **2.2 Culture media.** The lysogeny broth (LB) medium, comprising of 10 g/L peptone, 5 g/L  
131 yeast extract, and 5 g/L NaCl, was used for molecular cloning and seed cultures. The M9 hybrid  
132 medium (Layton and Trinh 2014) with 20 g/L glucose was used for ester production. Either 50  
133 µg/mL ampicillin (Amp) or 50 µg/mL kanamycin (Kan) was added to the media for selection  
134 where applicable.

135

136 **2.3 Microplate-based microbial screening method.** Cell inoculum was prepared either from  
137 a bacterial glycerol stock or from a single colony on a LB agar plate. Specifically, 1% (v/v) of  
138 stock cells were grown overnight in 5 mL of LB at 37°C and 200 rpm on a 75° angled platform  
139 in a New Brunswick Excella E25 (Eppendorf, CT, USA). Alternatively, single colonies from  
140 LB agar plates were inoculated in 100 µL of LB in 96-well microplates using sterile pipette  
141 tips. Each colony picked by a sterile pipette tip was subsequently mixed with the media in the  
142 target well and was grown overnight at 37°C and 400 rpm in an incubating microplate shaker.

143 For the microplate-based screening assay, 5 % (v/v) of cell inocula were first inoculated  
144 in 100  $\mu$ L of the M9 hybrid media containing 20 g/L of glucose, 0.1 mM of isopropyl  $\beta$ -D-1-  
145 thiogalactopyranoside (IPTG), and 2 g/L of alcohol (i.e., ethanol, n-butanol, isobutanol, or 2-  
146 phenylethyl alcohol) in 96-well microplates with or without hexadecane overlay in a 1:1 (v/v)  
147 ratio. The microplates were then sealed with a plastic adhesive sealing film, SealPlate®  
148 (EXCEL Scientific, Inc., CA, USA), to avoid cross contamination and evaporation. Finally,  
149 the microplates were incubated at 37°C and 400 rpm for 24 hours (h) in an incubating  
150 microplate shaker (Fisher Scientific, PA, USA).

151 The optical density (OD) of cell culture was measured at 600 nm using a BioTek  
152 Synergy HT microplate reader (BioTek Instruments, Inc., VT, USA). The dry cell weight  
153 (DCW) was obtained by multiplication of the optical density of culture broth with a pre-  
154 determined conversion factor, 0.385 g/L/OD. The organic layers were collected for ester  
155 measurement either by gas chromatography coupled with mass spectroscopy (GC/MS) or  
156 colorimetric assay.

157

158 **2.4 SDS-PAGE analysis.** For SDS-PAGE analysis, 1% (v/v) of stock cells were grown  
159 overnight at 37°C and 200 rpm in 15 mL culture tubes containing 5 mL of LB media and  
160 antibiotics. Then, 4% (v/v) of the overnight cultures were transferred into 1.5 mL of LB media  
161 containing antibiotics in a 24-well microplate (cat# 353224, BD Falcon). The cultures were  
162 next grown at 37°C and 400 rpm using an incubating microplate shaker. When the cultures  
163 reached an OD of 0.4~0.6, they were induced with 0.1 mM IPTG and sealed with a Breathe-  
164 Easy Sealing Membrane to prevent evaporation and cross contamination (cat# BEM-1,  
165 Research Products International Corp., IL, USA). After 4 h of induction, cells were collected  
166 by centrifugation and resuspended in 1X phosphate-buffered saline (PBS) buffer (pH7.4) at the  
167 final OD of 5. The cell pellets were disrupted using the B-PER complete reagent (cat# 89822,

168 Thermo Scientific, MA, USA). The resulting crude extracts were mixed with 6x sodium  
169 dodecyl sulfate (SDS) sample buffer and heated at 95°C for 5 min. Finally, the protein samples  
170 were analyzed by SDS-polyacrylamide gel electrophoresis (SDS-PAGE, 14% polyacrylamide  
171 gel). Protein bands were visualized with Coomassie Brilliant Blue staining.

172

173 **2.5 Gas chromatography coupled with mass spectroscopy (GC/MS).** The microplates from  
174 the microbial screening of AATs were centrifuged at 4,800 x g for 5 min and the hexadecane  
175 overlays were used for quantification of esters. The samples were prepared by diluting  
176 hexadecane extracts from the cultures with hexadecane containing internal standard (isoamyl  
177 alcohol) in a 1:1 (v/v) ratio. Then, 1 µL of samples were directly injected into a gas  
178 chromatograph (GC) HP 6890 equipped with the mass selective detector (MS) HP 5973. For  
179 the GC system, helium was used as the carrier gas at a flow rate of 0.5 mL/min and the analytes  
180 were separated on a Phenomenex ZB-5 capillary column (30 m x 0.25 mm x 0.25 µm). The  
181 oven temperature was programmed with an initial temperature of 50°C with a 1°C/min ramp  
182 to 58°C. Next a 25°C/min ramp was deployed to 235°C and then a 50°C/min ramp was  
183 deployed to 300°C. Finally held a temperature of 300°C for 2 minutes to elute any residual  
184 non-desired analytes. The injection was performed using the splitless mode with an initial  
185 injector temperature of 280°C. For the MS system, a selected ion monitoring (SIM) mode was  
186 deployed to detect analytes. The SIM parameters for detecting esters were as follows: i) for  
187 ethyl acetate, ions 45.00, and 61.00 detected from 4.15 to 5.70 min, ii) for isoamyl alcohol  
188 (internal standard), ions 45.00, and 88.00 detected from 5.70 to 6.60 min, iii) for isobutyl  
189 acetate, ions 61.00, and 101.00 detected from 6.60 to 7.75 min, iv) for butyl acetate, ions 61.00,  
190 and 116.00 detected from 7.75 to 13.70 min, and v) for 2-phenethyl acetate, ions 104.00, and  
191 121.00 detected from 13.70 to 13.95 min.

192



193 **2.6 Colorimetric assay for ester quantification.** The colorimetric assay for ester  
194 quantification was performed in a 96-well microplate. The protocol was slightly modified from  
195 the previously reported method (Lobs et al. 2016). Specifically, in each well, 60  $\mu$ L of  
196 hexadecane overlay from the culture was mixed with 20  $\mu$ L of hydroxylamine stock solution  
197 and incubated in an incubating microplate shaker at room temperature for 10 minutes (min) to  
198 produce hydroxamic acid. Next, 120  $\mu$ L of the ferric working solution (1/20-diluted stock ferric  
199 iron(III) solution in ethanol) was added to the reaction solution and incubated for 5 min to form  
200 an iron-hydroxamic acid complex. Finally, the absorbance was measured at 520 nm ( $A_{520}$ )  
201 using a BioTek Synergy HT microplate reader. Esters were quantified using a standard curve  
202 between the absorbances and known concentrations of a target ester.

203

204 **2.7 *In silico* mutagenesis of AATs.** The 3D structures of ATF1<sub>sc</sub>, acetyl-CoA, and butanol  
205 were first prepared for the model-guided protein engineering of ATF1<sub>sc</sub> in MOE (Molecular  
206 Operating Environment software), as previously described (Seo et al. 2019). To perform  
207 docking simulations in MOE, the potential binding pocket of ATF1<sub>sc</sub> was identified using the  
208 ‘Site Finder’ tool. Both of the conserved catalytic residues, H191 and D195, that are known to  
209 reside in the binding pocket of AATs (Navarro-Retamal et al. 2016), were selected. Acetyl-  
210 CoA and butanol were docked to the binding pocket of ATF1<sub>sc</sub> in a sequential step. After the  
211 docking simulations, the best-scored binding poses were selected for *in silico* mutagenesis. The  
212 ‘residue scan’ tool of MOE was used to identify beneficial mutations for the biosynthesis of  
213 the target ester (i.e., butyl acetate) in ATF1<sub>sc</sub> variants, based on their  $\Delta$ Affinity (kcal/mol)  
214 values. Here, the  $\Delta$ Affinity value represents the relative binding affinity between a mutant and  
215 its wild type, where a more negative value indicates a mutant with higher affinity. Details of  
216 the docking simulation and *in silico* mutagenesis analysis protocols in MOE can be found in  
217 the previous report (Lee et al. 2018).

## 218 **3. RESULTS AND DISCUSSION**

219 **3.1 Establishing a microplate-based culturing technique with *in situ* fermentation and**  
220 **extraction of esters.** To develop a high-throughput microbial screening platform for ester  
221 biosynthesis, we first examined whether the microplate-based culturing technique could be  
222 reliably used to monitor cell growth and continuously extract esters for downstream  
223 quantification. We characterized the recombinant BL21 (DE3) strains harboring 20 CAT<sub>Sa</sub> F97  
224 variants (Seo et al. 2019) in 96-well microplates for IBA production with or without solvent  
225 (hexadecane) overlay for *in situ* ester extraction (Fig. 1A). As a basis for comparison, we also  
226 performed the high cell density culturing method in shake tubes that was previously employed  
227 for AAT screening (Seo et al. 2019).

228 The characterization results show that IBA production in microplates followed the same  
229 trend of its production observed in high cell density cultures (Fig. 1B). Strong positive linear  
230 correlations ( $R^2 \geq 0.98$ ) in IBA production existed between the microplate-based and high cell  
231 density culturing methods (Figs. 1C, 1D). The microplate-based culturing method could  
232 validate that the CAT<sub>Sa</sub> F97W variant achieved the highest IBA production among the 20  
233 characterized variants (Table S2). While these variants exhibited different activities toward  
234 IBA, their cell cultures exhibited similar growth (Fig. S1).

235 Using solvent overlays for microbial biosynthesis of esters can provide several key  
236 advantages. First, the solvent overlay enables a more reliable measurement of cell growth in  
237 microplates by avoiding medium evaporation that caused water condensation (Fig. 1E) and  
238 hence interfered with optical density measurement (Fig. S1). Growth kinetics helps evaluate  
239 the effect of expressing AATs on microbial health. Second, the solvent overlay simplifies the  
240 sample preparation step for quantification of esters and is compatible with a high-throughput  
241 workflow, where esters in the solvent layer can be extracted for downstream measurement by  
242 either a GC/MS method or a colorimetric assay (Layton and Trinh 2014; Layton and Trinh

243 2016a; Layton and Trinh 2016b; Lobs et al. 2016; Rodriguez et al. 2014). Third, the solvent  
244 overlay helps alleviate the product toxicity during fermentation (Brennan et al. 2012) because  
245 esters are known to be inhibitory to microbial health (Wilbanks and Trinh 2017).

246 Taken altogether, the microplate-based culturing method with solvent overlays is  
247 reliable and suitable for a rapid, high-throughput *in vivo* screening platform for microbial ester  
248 production.

249

250 **3.2 Revealing the influential role of CAT<sub>Sa</sub> F97 residue by profiling alcohol preference of**  
251 **a library of F97 mutants with the microplate-based culturing method.** Our previous study  
252 discovered that the CAT<sub>Sa</sub> F97W mutant improved its catalytic efficiency towards isobutanol  
253 by ~2-fold (Seo et al. 2019). We hypothesized that the F97 residue might have an important  
254 role in determining the alcohol substrate preference. Using the established microplate-based  
255 culturing method, we evaluated whether it could be used for rapid profiling of the alcohol  
256 substrate preference of CAT<sub>Sa</sub> F97 variants. We characterized the recombinant *E. coli* strains  
257 carrying 20 CAT<sub>Sa</sub> F97 variants with exogenous supplementation of alcohols in the media  
258 including linear, short-chain alcohols (ethanol, butanol), a branched-chain alcohol (isobutanol),  
259 and an aromatic alcohol (2-phenylethyl alcohol) in microplates with hexadecane overlay.

260 The characterization results showed that mutations in the F97 residue changed the ester  
261 production profiles (Fig. 2A, Table S3), suggesting that F97 plays an important role in  
262 determining the alcohol substrate preference of CAT<sub>Sa</sub>. All the CAT<sub>Sa</sub> variants exhibited poor  
263 activities toward ethanol (Table S3). Among the four target acetate esters investigated, F97H  
264 produced 2-phenylethyl acetate (PEA) at the highest level of 194.63 mg/L followed by F97H  
265 (182.30 mg/L) and the wildtype F97 (149.41 mg/L) (Fig. 2A, Table S3). As compared to the  
266 wildtype, IBA production by F97W (91.22 mg/L) showed the highest improvement (~6.39-  
267 fold) (Fig. 2A, Table S3), which was relatively consistent with the prior *in vitro* study showing

268 that F97W variant achieved ~2-fold increase in the catalytic efficiency towards isobutanol (Seo  
269 et al. 2019). Remarkably, F97T showed BA production (12.42 mg/L) with high specificity,  
270 demonstrating the feasibility of production of designer esters using re-programmed CATs (Fig.  
271 2A, Table S3). Different from F97W, F97C exhibited the highest n-butyl acetate (BA)  
272 production (18.26 mg/L) (Fig. 2A, Table S3). Examining the protein structure of CAT<sub>sa</sub> can  
273 provide some insights its alcohol substrate preference (Fig. 2B). As shown, the binding pockets  
274 of CATs are formed at the subunit interfaces (Day and Shaw 1992) and the F97 residue located  
275 on the opposite subunit of the catalytic residues, H189 and D193. One possible explanation on  
276 how only one residue replacement influences the substrate preference of CAT<sub>sa</sub> is that the  
277 mutation in the F97 residue might dramatically change the size and/or shape of the binding  
278 pocket and hence alternate the interactions among subunits of CAT<sub>sa</sub>.

279 Taken altogether, the microplate-based culturing method coupled with GC/MS can be  
280 employed for rapid profiling of substrate preferences of AATs. The method revealed the  
281 important role of the F97 residue in determining the alcohol substrate preference of CAT<sub>sa</sub>.

282

283 **3.3 Developing a high-throughput microbial screening platform for ester biosynthesis by**  
284 **integration of the microplate-based culturing method and a colorimetric assay.** High-  
285 throughput screening of ester biosynthesis has been limited by the use of GC/MS. Since the  
286 reactions of esters with hydroxylamine generate hydroxamic acids that form purple complexes  
287 with ferric ion, esters can be determined colorimetrically by measuring absorbance at 520 nm  
288 (Fig. 3A, 3B) (Hill 1946; Lobs et al. 2016; Stern and Shapiro 1953; Wofford et al. 1986). This  
289 colorimetric assay has recently been adapted for high-throughput screening of ethyl acetate  
290 (EA) production from C5, C6, and C12 carbon sources in *Kluyveromyces marxianus* (Lobs et  
291 al. 2016) where cell culture samples were first collected followed by ester extraction with  
292 hexane. This protocol is useful but might not be compatible with the microplate-based culturing

293 method in our study because hexane is toxic and hence cannot be used for *in situ* fermentation  
294 and extraction, unlike hexadecane. Here, we tested whether the colorimetric assay can be  
295 modified and coupled with the microplate-based culturing method to facilitate a high-  
296 throughput microbial screening of AATs for ester biosynthesis.

297 To compare ester quantification by the colorimetric assay and GC/MS method, we  
298 analyzed IBA production by the *E. coli* BL21 (DE3) strains harboring the 20 F97 variants as  
299 demonstrated for microplate-based culturing method. We started by developing a standard  
300 curve to estimate IBA production by the colorimetric assay. Using pure IBA in hexadecane, an  
301 almost perfect linear correlation ( $R^2=0.999$ ) was established between absorbance at 520 nm  
302 and IBA concentration within 0-200 mg/L (Fig. 3C). When using esters in hexadecane from  
303 the cell culture samples for the colorimetric assay, we found that the colorimetric assay could  
304 determine the IBA concentrations consistently with the GC/MS method (Fig. 3D).

305 Critical to the high-throughput microbial screening method to estimate the target esters  
306 from the culture samples is to have an appropriate control for the baseline adjustment in the  
307 colorimetric assay. In our study, we found that the colorimetric method could overestimate the  
308 IBA production as compared to the GC/MS method (Fig. S2B, Table S4). Since the *E. coli* host  
309 produced ethanol endogenously, EA was produced as an inevitable by-product (Fig. S2A),  
310 causing the observed IBA overestimation. To avoid this problem, we used  $\Delta Ab_{520}$  for  
311 estimating IBA production where  $\Delta Ab_{520} = Ab_{520, AAT^+, ROH^+} - Ab_{520, AAT^+, ROH^-}$  is the absorbance  
312 difference between culture samples with and without the target alcohol (ROH) availability. The  
313 target alcohol can be supplemented externally or produced by the cells. One other strategy that  
314 might help avoid the target ester (e.g., IBA) overestimation problem by the colorimetric assay  
315 is to use a host strain void of the endogenous pathways causing the biosynthesis of the  
316 unwanted alcohol byproduct (e.g., ethanol).

317 It is important to note that during our protocol development, we observed that the  
318 perturbed, emulsified layer of an immiscible hexadecane-ethanol mixture interfered with the  
319 measured absorbance and generated irreproducible data. Note that ethanol is originated from  
320 the ferric solution used in the colorimetric assay. This problem did not occur in the previous  
321 study (Lobs et al. 2016) likely because hexane used for ester extraction is miscible in ethanol.  
322 To address this problem, we used a centrifugation step to create the immiscible hexadecane-  
323 ethanol mixture with the transparent organic phase and strong purple aqueous phase (Fig. 3B).

324 Overall, the microplate-based culturing method coupled with a colorimetric assay is  
325 suitable for high-throughput microbial screening of AATs for ester biosynthesis.

326

### 327 **3.4 Combining the model-guided protein engineering and high-throughput microbial** 328 **screening platform to rapidly identify ATF1<sub>sc</sub> variants for improved BA production**

329 With the established high-throughput microbial screening platform, we applied it to rapidly  
330 identify the engineered ATF1<sub>sc</sub> mutants for enhanced BA production (Fig. 4A). We started by  
331 generating a library of potential ATF1<sub>sc</sub> candidates for improved BA production *in silico* for  
332 high-throughput microbial screening. To do this, we first created a 3-D structure of ATF1<sub>sc</sub>  
333 using the homology model of 15-O-acetyltransferase (PDB:3FP0) best predicted by SWISS-  
334 MODEL (Waterhouse et al. 2018). We next identified the binding pocket of ATF1<sub>sc</sub> for  
335 docking simulations of the BA co-substrates, including acetyl-CoA and butanol. Based on the  
336 homology model, the binding pocket of ATF1<sub>sc</sub> consists of 24 residues including V32, Y36,  
337 H191, D195, G196, R197, T316, I347, P348, A349, D350, R352, N370, V371, I374, F376,  
338 Y399, I403, L407, K426, L448, S449, N450, V451, F471, and Q473, where H191 and D195  
339 are the catalytic residues (Fig. S3A). By performing docking simulations, we generated the  
340 acetyl-CoA-butanol-ATF1<sub>sc</sub> complex and identified the residues interacting with butanol  
341 including V32, Y36, D195, P348, V371, L447, S449, Q473, Q475, and S483 (Fig. S3B).

342 Finally, we performed the residue scan against these 10 residues to select the top 12 promising  
343 candidates including P348W, P348R, P348M, P348H, P348K, P348N, P348I, P348S, P348D,  
344 P348C, P348A, and P348Q for experimental characterization (Fig. 4B).

345 To perform the high-throughput microbial screening of the top 12 engineered ATF1<sub>sc</sub>  
346 candidates for improved BA production, we used TCS083  $\Delta$ *fadE* (DE3) (Layton and Trinh 2014)  
347 as a host strain. Like the colorimetric assay developed for IBA measurement, the standard curve  
348 for BA measurement showed a strong linear correlation ( $R^2=0.999$ ) between the 520 nm  
349 absorbance and the standard BA concentrations in the range of 0-200 mg/L (Fig. 4C). Our  
350 screening results shows that the P348M, P348A, or P348S mutation in ATF1<sub>sc</sub> improved BA  
351 production by 3.34, 2.90, or 2.88-fold, respectively (Fig. 4D). To confirm this result, we  
352 compared the BA titers measured by the colorimetric assay with those by GC/MS. Remarkably,  
353 we could observe almost identical BA titers between the two methods (Table S5) with a strong  
354 linear correlation ( $R^2=0.973$ ) (Fig. 4E). This result demonstrates the high-throughput microbial  
355 screening platform is suitable for rapidly identifying AATs for designer ester biosynthesis.  
356 Interestingly, like the F97 residue in CAT<sub>sa</sub> (Fig. 2B), the P348 residue in ATF1<sub>sa</sub> is also  
357 located on the opposite side of the catalytic residues including H191 and D195 (Fig. 4F) and  
358 interacts with an alcohol substrate, which might determine the alcohol substrate preference.

359 Overall, we rationally engineered ATF1<sub>sc</sub> for improved BA production through a  
360 model-guided rational protein engineering and rapidly identified the beneficial ATF1<sub>sc</sub> variants  
361 using the established high-throughput microbial screening platform.

362

#### 363 **4. CONCLUSION**

364 We developed a high-throughput microbial screening platform to probe specificities of  
365 AATs/CATs for designer ester biosynthesis. This platform integrated the microplate culturing  
366 method with a modified colorimetric assay previously established, which provides useful



367 information about AAT expression and activity, microbial health, and ester production. For the  
368 microplate-based culturing protocol, the use of solvent overlays is critical to minimize medium  
369 evaporation, generate reproducible growth measurement, and eliminate the ester extraction step.  
370 For colorimetric assay, the addition of a centrifugation step is crucial to avoid the interference  
371 of ethanol-hexadecane immiscible layer that causes irreproducible measurement. The high-  
372 throughput microbial screening platform not only confirmed CAT<sub>sa</sub> F97W with enhanced  
373 isobutyl acetate synthesis but also identified the three ATF1<sub>sc</sub> (P348M, P348A, and P348S)  
374 variants generated by model-guided rational protein engineering for enhanced butyl acetate  
375 production. Overall, this study presents a high-throughput microbial screening platform for  
376 rapid profiling of the alcohol substrate preference of AATs for production of designer esters.  
377 We believe that this platform is scalable and compatible with automated microplate handling  
378 systems to increase its screening capacity.

379

## 380 **ACKNOWLEDGEMENTS**

381 This research was financially supported in part by the NSF CAREER award (NSF#1553250),  
382 the DOE BER Genomic Science Program (DE-SC0019412), and the DOE subcontract grant  
383 (DE-AC05-000R22725) by the Center of Bioenergy Innovation, the U.S. Department of  
384 Energy Bioenergy Research Center funded by the Office of Biological and Environmental  
385 Research in the DOE Office of Science, and the U.S. Department of Energy Joint Genome  
386 Institute. The authors would like to thank the Center of Environmental Biotechnology at UTK  
387 for using the GC/MS instrument.

388



## 389 REFERENCES

- 390 Aharoni A, Keizer LCP, Bouwmeester HJ, Sun ZK, Alvarez-Huerta M, Verhoeven HA, Blaas  
391 J, van Houwelingen AMML, De Vos RCH, van der Voet H and others. 2000. Identification of  
392 the SAAT gene involved in strawberry flavor biogenesis by use of DNA microarrays. *Plant*  
393 *Cell* 12(5):647-661.
- 394 Balbontin C, Gaete-Eastman C, Fuentes L, Figueroa CR, Herrera R, Manriquez D, Latche A,  
395 Pech JC, Moya-Leon MA. 2010. VpAAT1, a Gene Encoding an Alcohol Acyltransferase, Is  
396 Involved in Ester Biosynthesis during Ripening of Mountain Papaya Fruit. *Journal of*  
397 *Agricultural and Food Chemistry* 58(8):5114-5121.
- 398 Beekwilder J, Alvarez-Huerta M, Neef E, Verstappen FWA, Bouwmeester HJ, Aharoni A.  
399 2004. Functional characterization of enzymes forming volatile esters from strawberry and  
400 banana. *Plant Physiology* 135(4):1865-1878.
- 401 Brennan TC, Turner CD, Kromer JO, Nielsen LK. 2012. Alleviating monoterpene toxicity  
402 using a two-phase extractive fermentation for the bioproduction of jet fuel mixtures in  
403 *Saccharomyces cerevisiae*. *Biotechnol Bioeng* 109(10):2513-22.
- 404 Chacon MG, Kendrick EG, Leak DJ. 2019. Engineering *Escherichia coli* for the production of  
405 butyl octanoate from endogenous octanoyl-CoA. *PeerJ* 7.
- 406 Cumplido-Laso G, Medina-Puche L, Moyano E, Hoffmann T, Sinz Q, Ring L, Studart-  
407 Wittkowski C, Caballero JL, Schwab W, Munoz-Blanco J and others. 2012. The fruit ripening-  
408 related gene FaAAT2 encodes an acyl transferase involved in strawberry aroma biogenesis.  
409 *Journal of Experimental Botany* 63(11):4275-4290.
- 410 Day PJ, Shaw WV. 1992. Acetyl coenzyme A binding by chloramphenicol acetyltransferase.  
411 Hydrophobic determinants of recognition and catalysis. *J Biol Chem* 267(8):5122-7.
- 412 El-Sharkawy I, Manriquez D, Flores FB, Regad F, Bouzayen M, Latche A, Pech JC. 2005.  
413 Functional characterization of a melon alcohol acyl-transferase gene family involved in the

- 414 biosynthesis of ester volatiles. Identification of the crucial role of a threonine residue for  
415 enzyme activity\*. *Plant Mol Biol* 59(2):345-62.
- 416 Gibson DG, Young L, Chuang RY, Venter JC, Hutchison CA, Smith HO. 2009. Enzymatic  
417 assembly of DNA molecules up to several hundred kilobases. *Nature Methods* 6(5):343-U41.
- 418 Gonzalez M, Gaete-Eastman C, Valdenegro M, Figueroa CR, Fuentes L, Herrera R, Moya-  
419 Leon MA. 2009. Aroma Development during Ripening of *Fragaria chiloensis* Fruit and  
420 Participation of an Alcohol Acyltransferase (FcAAT1) Gene. *Journal of Agricultural and Food*  
421 *Chemistry* 57(19):9123-9132.
- 422 Gonzalez-Aguero M, Troncoso S, Gudenschwager O, Campos-Vargas R, Moya-Leon MA,  
423 Defilippi BG. 2009. Differential expression levels of aroma-related genes during ripening of  
424 apricot (*Prunus armeniaca* L.). *Plant Physiology and Biochemistry* 47(5):435-440.
- 425 Hill UT. 1946. Colorimetric Determination of Fatty Acids and Esters. *Industrial and*  
426 *Engineering Chemistry-Analytical Edition* 18(5):317-319.
- 427 Knight MJ, Bull ID, Curnow P. 2014. The yeast enzyme Eht1 is an octanoyl-CoA:ethanol  
428 acyltransferase that also functions as a thioesterase. *Yeast* 31(12):463-74.
- 429 Kruis AJ, Levisson M, Mars AE, van der Ploeg M, Daza FG, Ellena V, Kengen SWM, van der  
430 Oost J, Weusthuis RA. 2017. Ethyl acetate production by the elusive alcohol acetyltransferase  
431 from yeast. *Metabolic Engineering* 41:92-101.
- 432 Layton DS, Trinh CT. 2014. Engineering modular ester fermentative pathways in *Escherichia*  
433 *coli*. *Metabolic Engineering* 26:77-88.
- 434 Layton DS, Trinh CT. 2016a. Expanding the modular ester fermentative pathways for  
435 combinatorial biosynthesis of esters from volatile organic acids. *Biotechnol Bioeng*  
436 113(8):1764-76.
- 437 Layton DS, Trinh CT. 2016b. Microbial synthesis of a branched-chain ester platform from  
438 organic waste carboxylates. *Metab Eng Commun* 3:245-251.

- 439 Layton DS, Trinh, C.T. 2014. Engineering Modular Ester Fermentative Pathways in  
440 *Escherichia coli*. *Metab Eng.* 26:77-88.
- 441 Lee J, Trinh CT. 2018. De novo Microbial Biosynthesis of a Lactate Ester Platform.  
442 bioRxiv:498576.
- 443 Lee JW, Niraula NP, Trinh CT. 2018. Harnessing a P450 fatty acid decarboxylase from  
444 *Macrococcus caseolyticus* for microbial biosynthesis of odd chain terminal alkenes. *Metab*  
445 *Eng Commun* 7:e00076.
- 446 Lee JW, Trinh CT. 2019. Microbial biosynthesis of lactate esters. *Biotechnology for Biofuels*  
447 12(1).
- 448 Lee JW, Trinh CT. 2020. Towards renewable flavors, fragrances, and beyond. *Current Opinion*  
449 *in Biotechnology* 61:168-180.
- 450 Li DP, Xu YF, Xu GM, Gu LK, Li DQ, Shu HR. 2006. Molecular cloning and expression of a  
451 gene encoding alcohol acyltransferase (MdaAT2) from apple.(cv. Golden Delicious).  
452 *Phytochemistry* 67(7):658-667.
- 453 Lin JL, Zhu J, Wheeldon I. 2016. Rapid ester biosynthesis screening reveals a high activity  
454 alcohol-O-acyltransferase (AATase) from tomato fruit. *Biotechnology Journal* 11(5):700-707.
- 455 Lobs AK, Lin JL, Cook M, Wheeldon I. 2016. High throughput, colorimetric screening of  
456 microbial ester biosynthesis reveals high ethyl acetate production from *Kluyveromyces*  
457 *marxianus* on C5, C6, and C12 carbon sources. *Biotechnol J* 11(10):1274-1281.
- 458 Lucchetta L, Manriquez D, El-Sharkawy I, Flores FB, Sanchez-Bel P, Zouine M, Ginies C,  
459 Bouzayen M, Rombaldi C, Pech JC and others. 2007. Biochemical and catalytic properties of  
460 three recombinant alcohol acyltransferases of melon. Sulfur-containing ester formation,  
461 regulatory role of CoA-SH in activity, and sequence elements conferring substrate preference.  
462 *Journal of Agricultural and Food Chemistry* 55(13):5213-5220.

- 463 Navarro-Retamal C, Gaete-Eastman C, Herrera R, Caballero J, Alzate-Morales JH. 2016.  
464 Structural and Affinity Determinants in the Interaction between Alcohol Acyltransferase from  
465 *F. x ananassa* and Several Alcohol Substrates: A Computational Study. *Plos One* 11(4).  
466 Rodriguez GM, Tashiro Y, Atsumi S. 2014. Expanding ester biosynthesis in *Escherichia coli*.  
467 *Nature Chemical Biology* 10(4):259-+.  
468 Seo H, Lee J-W, Giannone RJ, Dunlap NJ, Trinh CT. 2020. Repurposing chloramphenicol  
469 acetyltransferase for a robust and efficient designer ester biosynthesis platform. *bioRxiv*.  
470 Seo H, Lee JW, Garcia S, Trinh CT. 2019. Single mutation at a highly conserved region of  
471 chloramphenicol acetyltransferase enables isobutyl acetate production directly from cellulose  
472 by *Clostridium thermocellum* at elevated temperatures. *Biotechnology for Biofuels* 12(1).  
473 Souleyre EJJ, Chagne D, Chen XY, Tomes S, Turner RM, Wang MY, Maddumage R, Hunt  
474 MB, Winz RA, Wiedow C and others. 2014. The AAT1 locus is critical for the biosynthesis  
475 of esters contributing to 'ripe apple' flavour in 'Royal Gala' and 'Granny Smith' apples. *Plant*  
476 *Journal* 78(6):903-915.  
477 Souleyre EJJ, Greenwood DR, Friel EN, Karunairetnam S, Newcomb RD. 2005. An alcohol  
478 acyl transferase from apple (cv. Royal Gala), MpAAT1, produces esters involved in apple fruit  
479 flavor. *Febs Journal* 272(12):3132-3144.  
480 Stern I, Shapiro B. 1953. A Rapid and Simple Method for the Determination of Esterified Fatty  
481 Acids and for Total Fatty Acids in Blood. *Journal of Clinical Pathology* 6(2):158-160.  
482 Tai Y-S, Xiong M, Zhang K. 2015a. Engineered biosynthesis of medium-chain esters in  
483 *Escherichia coli*. *Metabolic Engineering* 27:20-28.  
484 Tai YS, Xiong MY, Zhang KC. 2015b. Engineered biosynthesis of medium-chain esters in  
485 *Escherichia coli*. *Metabolic Engineering* 27:20-28.  
486 Verstrepen KJ, Van Laere SD, Vanderhaegen BM, Derdelinckx G, Dufour JP, Pretorius IS,  
487 Winderickx J, Thevelein JM, Delvaux FR. 2003. Expression levels of the yeast alcohol

488 acetyltransferase genes ATF1, Lg-ATF1, and ATF2 control the formation of a broad range of  
489 volatile esters. *Appl Environ Microbiol* 69(9):5228-37.

490 Waterhouse A, Bertoni M, Bienert S, Studer G, Tauriello G, Gumienny R, Heer FT, de Beer  
491 TAP, Rempfer C, Bordoli L and others. 2018. SWISS-MODEL: homology modelling of  
492 protein structures and complexes. *Nucleic Acids Research* 46(W1):W296-W303.

493 Wilbanks B, Trinh CT. 2017. Comprehensive characterization of toxicity of fermentative  
494 metabolites on microbial growth. *Biotechnology for Biofuels* 10(1):262.

495 Wofford NQ, Beaty PS, Mcinerney MJ. 1986. Preparation of Cell-Free-Extracts and the  
496 Enzymes Involved in Fatty-Acid Metabolism in *Syntrophomonas-Wolfei*. *Journal of*  
497 *Bacteriology* 167(1):179-185.

498 Zheng L, Baumann U, Reymond JL. 2004. An efficient one-step site-directed and site-  
499 saturation mutagenesis protocol. *Nucleic Acids Res* 32(14):e115.

500

501

502 **Table 1:** The list of plasmids and strains used in this study.

| Name                      | Description                                                                                                                                                                                                                        | Source                   |
|---------------------------|------------------------------------------------------------------------------------------------------------------------------------------------------------------------------------------------------------------------------------|--------------------------|
| <b>Strains</b>            |                                                                                                                                                                                                                                    |                          |
| <i>E. coli</i> TOP10      | F <sup>-</sup> <i>mcrA</i> Δ( <i>mrr-hsdRMS-mcrBC</i> ) ϕ80 <i>lacZ</i> Δ <i>M15</i><br>Δ <i>lacX74 recA1 araD139</i> Δ( <i>ara-leu</i> )7697 <i>galU galK</i><br>λ <sup>-</sup> <i>rpsL</i> (Str <sup>R</sup> ) <i>endA1 nupG</i> | Invitrogen               |
| BL21 (DE3)                | F <sup>-</sup> <i>ompT hsdS<sub>B</sub></i> (r <sub>B</sub> <sup>-</sup> m <sub>B</sub> <sup>-</sup> ) <i>gal dcm</i> (DE3)                                                                                                        | Invitrogen               |
| EcDL002                   | TCS083 Δ <i>fadE</i> (DE3)                                                                                                                                                                                                         | (Layton and Trinh 2014)  |
| <b>Plasmids</b>           |                                                                                                                                                                                                                                    |                          |
| pCAT <sub>Sa</sub>        | pETDuet-1 carrying CAT <sub>Sa</sub> ; Amp <sup>R</sup>                                                                                                                                                                            | (Seo et al. 2019)        |
| pCAT <sub>Sa</sub> F97R   | pETDuet-1 carrying CAT <sub>Sa</sub> F97R; Amp <sup>R</sup>                                                                                                                                                                        | (Seo et al. 2019)        |
| pCAT <sub>Sa</sub> F97H   | pETDuet-1 carrying CAT <sub>Sa</sub> F97H; Amp <sup>R</sup>                                                                                                                                                                        | (Seo et al. 2019)        |
| pCAT <sub>Sa</sub> F97K   | pETDuet-1 carrying CAT <sub>Sa</sub> F97K; Amp <sup>R</sup>                                                                                                                                                                        | (Seo et al. 2019)        |
| pCAT <sub>Sa</sub> F97D   | pETDuet-1 carrying CAT <sub>Sa</sub> F97D; Amp <sup>R</sup>                                                                                                                                                                        | (Seo et al. 2019)        |
| pCAT <sub>Sa</sub> F97E   | pETDuet-1 carrying CAT <sub>Sa</sub> F97E; Amp <sup>R</sup>                                                                                                                                                                        | (Seo et al. 2019)        |
| pCAT <sub>Sa</sub> F97S   | pETDuet-1 carrying CAT <sub>Sa</sub> F97S; Amp <sup>R</sup>                                                                                                                                                                        | (Seo et al. 2019)        |
| pCAT <sub>Sa</sub> F97T   | pETDuet-1 carrying CAT <sub>Sa</sub> F97T; Amp <sup>R</sup>                                                                                                                                                                        | (Seo et al. 2019)        |
| pCAT <sub>Sa</sub> F97N   | pETDuet-1 carrying CAT <sub>Sa</sub> F97N; Amp <sup>R</sup>                                                                                                                                                                        | (Seo et al. 2019)        |
| pCAT <sub>Sa</sub> F97Q   | pETDuet-1 carrying CAT <sub>Sa</sub> F97Q; Amp <sup>R</sup>                                                                                                                                                                        | (Seo et al. 2019)        |
| pCAT <sub>Sa</sub> F97C   | pETDuet-1 carrying CAT <sub>Sa</sub> F97C; Amp <sup>R</sup>                                                                                                                                                                        | (Seo et al. 2019)        |
| pCAT <sub>Sa</sub> F97G   | pETDuet-1 carrying CAT <sub>Sa</sub> F97G; Amp <sup>R</sup>                                                                                                                                                                        | (Seo et al. 2019)        |
| pCAT <sub>Sa</sub> F97Y   | pETDuet-1 carrying CAT <sub>Sa</sub> F97Y; Amp <sup>R</sup>                                                                                                                                                                        | (Seo et al. 2019)        |
| pCAT <sub>Sa</sub> F97P   | pETDuet-1 carrying CAT <sub>Sa</sub> F97P; Amp <sup>R</sup>                                                                                                                                                                        | (Seo et al. 2019)        |
| pCAT <sub>Sa</sub> F97A   | pETDuet-1 carrying CAT <sub>Sa</sub> F97A; Amp <sup>R</sup>                                                                                                                                                                        | (Seo et al. 2019)        |
| pCAT <sub>Sa</sub> F97V   | pETDuet-1 carrying CAT <sub>Sa</sub> F97V; Amp <sup>R</sup>                                                                                                                                                                        | (Seo et al. 2019)        |
| pCAT <sub>Sa</sub> F97I   | pETDuet-1 carrying CAT <sub>Sa</sub> F97I; Amp <sup>R</sup>                                                                                                                                                                        | (Seo et al. 2019)        |
| pCAT <sub>Sa</sub> F97L   | pETDuet-1 carrying CAT <sub>Sa</sub> F97L; Amp <sup>R</sup>                                                                                                                                                                        | (Seo et al. 2019)        |
| pCAT <sub>Sa</sub> F97M   | pETDuet-1 carrying CAT <sub>Sa</sub> F97M; Amp <sup>R</sup>                                                                                                                                                                        | (Seo et al. 2019)        |
| pCAT <sub>Sa</sub> F97W   | pETDuet-1 carrying CAT <sub>Sa</sub> F97W; Amp <sup>R</sup>                                                                                                                                                                        | (Seo et al. 2019)        |
| pDL004                    | pETite carrying ATF1 <sub>Sc</sub> ; Kan <sup>R</sup>                                                                                                                                                                              | (Layton and Trinh 2016a) |
| pATF1 <sub>Sc</sub>       | pET29 carrying ATF1 <sub>Sc</sub> ; Kan <sup>R</sup>                                                                                                                                                                               | This study               |
| pATF1 <sub>Sc</sub> P348W | pET29 carrying ATF1 <sub>Sc</sub> P348W; Kan <sup>R</sup>                                                                                                                                                                          | This study               |
| pATF1 <sub>Sc</sub> P348R | pET29 carrying ATF1 <sub>Sc</sub> P348R; Kan <sup>R</sup>                                                                                                                                                                          | This study               |
| pATF1 <sub>Sc</sub> P348M | pET29 carrying ATF1 <sub>Sc</sub> P348M; Kan <sup>R</sup>                                                                                                                                                                          | This study               |
| pATF1 <sub>Sc</sub> P348H | pET29 carrying ATF1 <sub>Sc</sub> P348H; Kan <sup>R</sup>                                                                                                                                                                          | This study               |
| pATF1 <sub>Sc</sub> P348K | pET29 carrying ATF1 <sub>Sc</sub> P348K; Kan <sup>R</sup>                                                                                                                                                                          | This study               |
| pATF1 <sub>Sc</sub> P348N | pET29 carrying ATF1 <sub>Sc</sub> P348N; Kan <sup>R</sup>                                                                                                                                                                          | This study               |
| pATF1 <sub>Sc</sub> P348I | pET29 carrying ATF1 <sub>Sc</sub> P348I; Kan <sup>R</sup>                                                                                                                                                                          | This study               |
| pATF1 <sub>Sc</sub> P348S | pET29 carrying ATF1 <sub>Sc</sub> P348S; Kan <sup>R</sup>                                                                                                                                                                          | This study               |
| pATF1 <sub>Sc</sub> P348D | pET29 carrying ATF1 <sub>Sc</sub> P348D; Kan <sup>R</sup>                                                                                                                                                                          | This study               |
| pATF1 <sub>Sc</sub> P348C | pET29 carrying ATF1 <sub>Sc</sub> P348C; Kan <sup>R</sup>                                                                                                                                                                          | This study               |
| pATF1 <sub>Sc</sub> P348A | pET29 carrying ATF1 <sub>Sc</sub> P348A; Kan <sup>R</sup>                                                                                                                                                                          | This study               |
| pATF1 <sub>Sc</sub> P348Q | pET29 carrying ATF1 <sub>Sc</sub> P348Q; Kan <sup>R</sup>                                                                                                                                                                          | This study               |

503

504

## 505 **FIGURE LEGENDS**

506 **Figure 1.** A microplate-based culturing method for microbial biosynthesis of esters with *in situ*  
507 product extraction. **(A)** Workflow of the microplate-based culturing method. **(B)** Comparison  
508 of IBA production among three different culturing methods by the recombinant BL21 (DE3)  
509 strains carrying the 20 CAT<sub>Sa</sub> F97 variants after 24 h. **(C-D)** Comparison of **(C)** IBA titer and  
510 **(D)** specific productivity among three different culturing methods. The error bars represent  
511 standard deviation of four biological replicates ( $n=4$ ). **(E)** Effect of solvent overlay on growth  
512 kinetics measurement in the microplate-based culturing method.

513

514 **Figure 2.** Rapid profiling of the alcohol substrate preference of CAT<sub>Sa</sub> F97 variants. **(A)**  
515 Relative fold change in ester production to wild type. **(B)** The 3D structure of homology model  
516 of CAT<sub>Sa</sub> and the reaction mechanism. F97 residue (in green); catalytic residues H189 and  
517 D193 (in cyan); binding pockets (in grey clouds). Note: ethyl acetate production was not shown  
518 here due to low or no detectable amounts (Table S3).

519

520 **Figure 3.** Development of the high-throughput microbial screening platform. **(A)** Chemical  
521 reactions involved in the colorimetric assay for ester quantification. **(B)** Demonstration of the  
522 colorimetric assay in a microplate conducted for hexadecane overlay samples and a series of  
523 IBA standards at different concentrations. **(C)** The IBA standard curve. **(D)** Comparison of the  
524 IBA titers measured by the high-throughput microbial screening and GC/MS methods. The  
525 error bars represent standard deviation of three biological replicates ( $n=3$ ).

526

527 **Figure 4.** Rapid identification of the beneficial ATF1<sub>Sc</sub> variants for improved butyl acetate (BA)  
528 production. **(A)** A schematic workflow of the high-throughput microbial screening platform  
529 used to identify ATF1<sub>Sc</sub> from a library of variants generated by the model-aided protein design.

530 **(B)** Residue scan results of the residues interacting with butanol in the acetyl-CoA-butanol-  
531 ATF1<sub>Sc</sub> complex. The orange bars represent the selected top 12 candidates for further studies.  
532 **(C)** The BA standard curve used for the quantification of BA in the colorimetric assay. **(D)**  
533 Screening results of the selected top 12 candidates. The error bars represent standard deviation  
534 of four biological replicates ( $n=4$ ). **(E)** Correlation of the measured BA titer between the  
535 colorimetric assay and GC/MS methods. **(F)** The location of P348 residue in ATF1<sub>Sc</sub>. A yellow  
536 cloud represents a binding pocket of ATF1<sub>Sc</sub>.  
537  
538



539 **Figure 1**

540

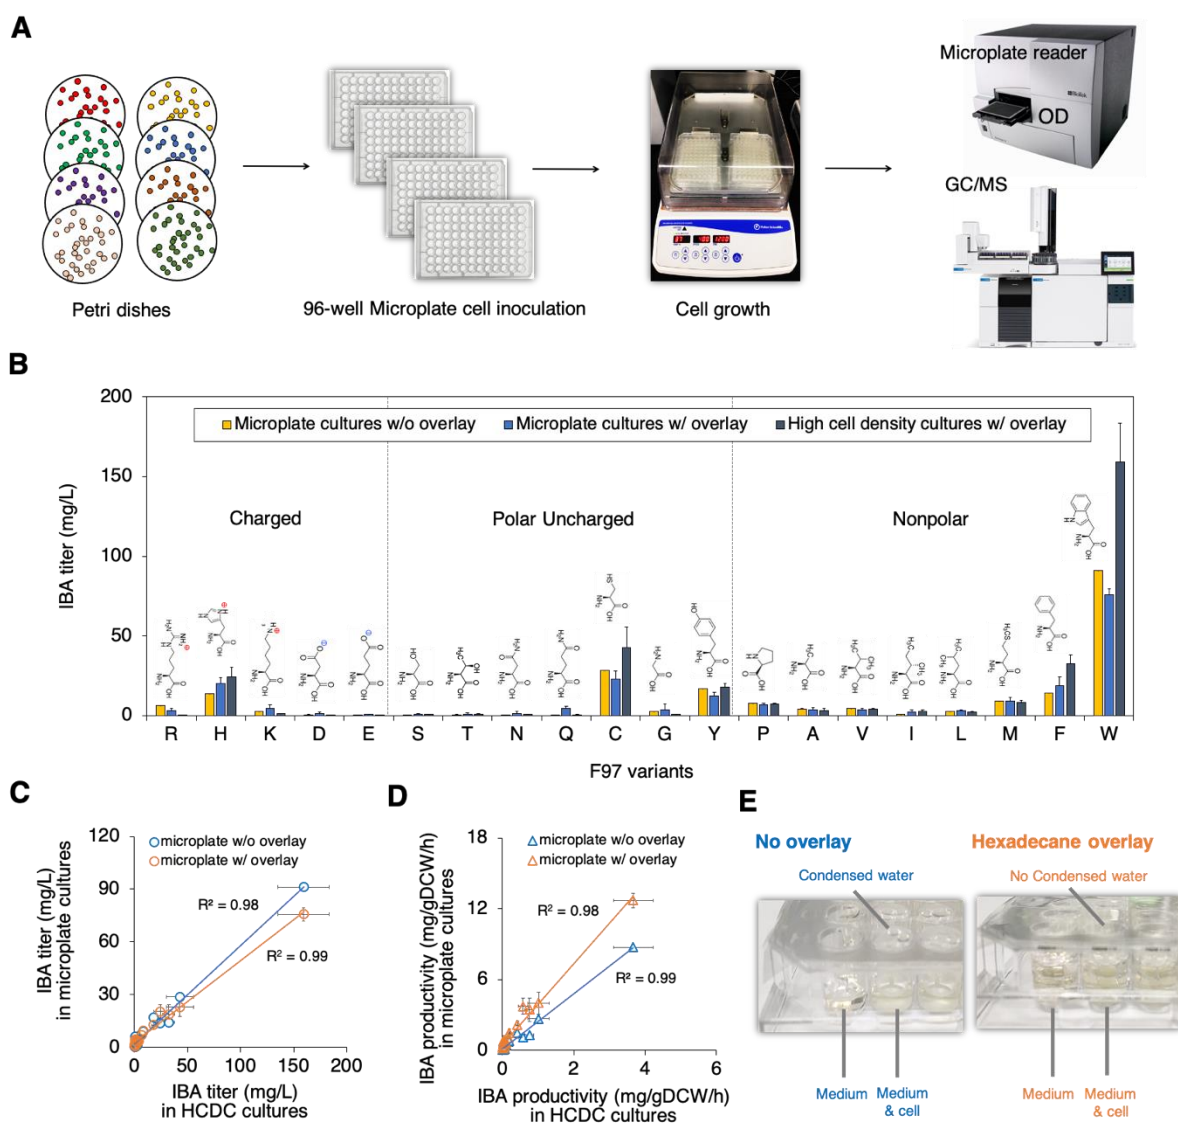

541

542

543

544 **Figure 2**

545

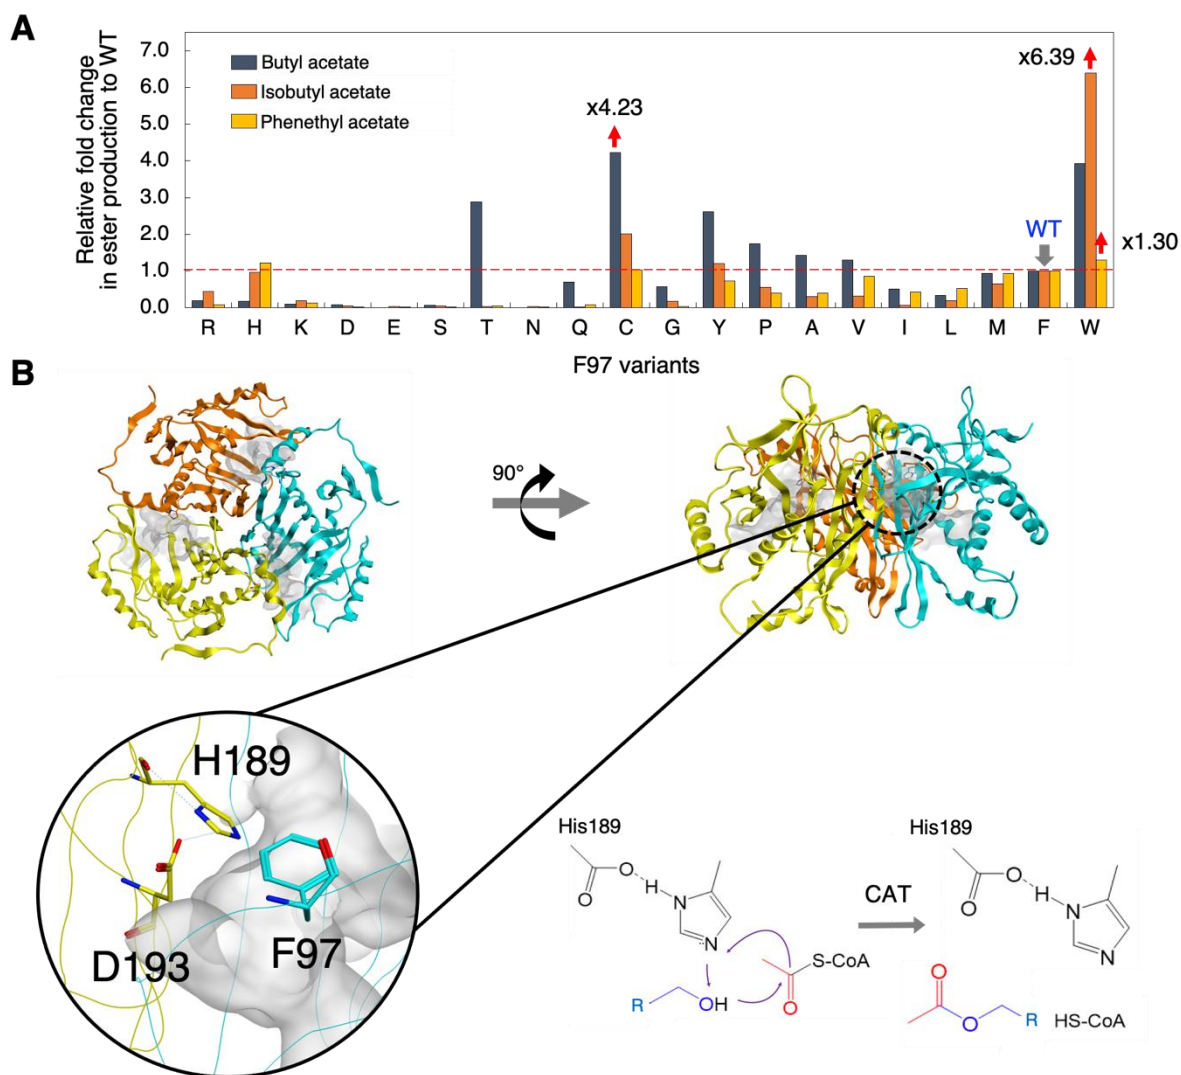

546

547

548 **Figure 3**

549

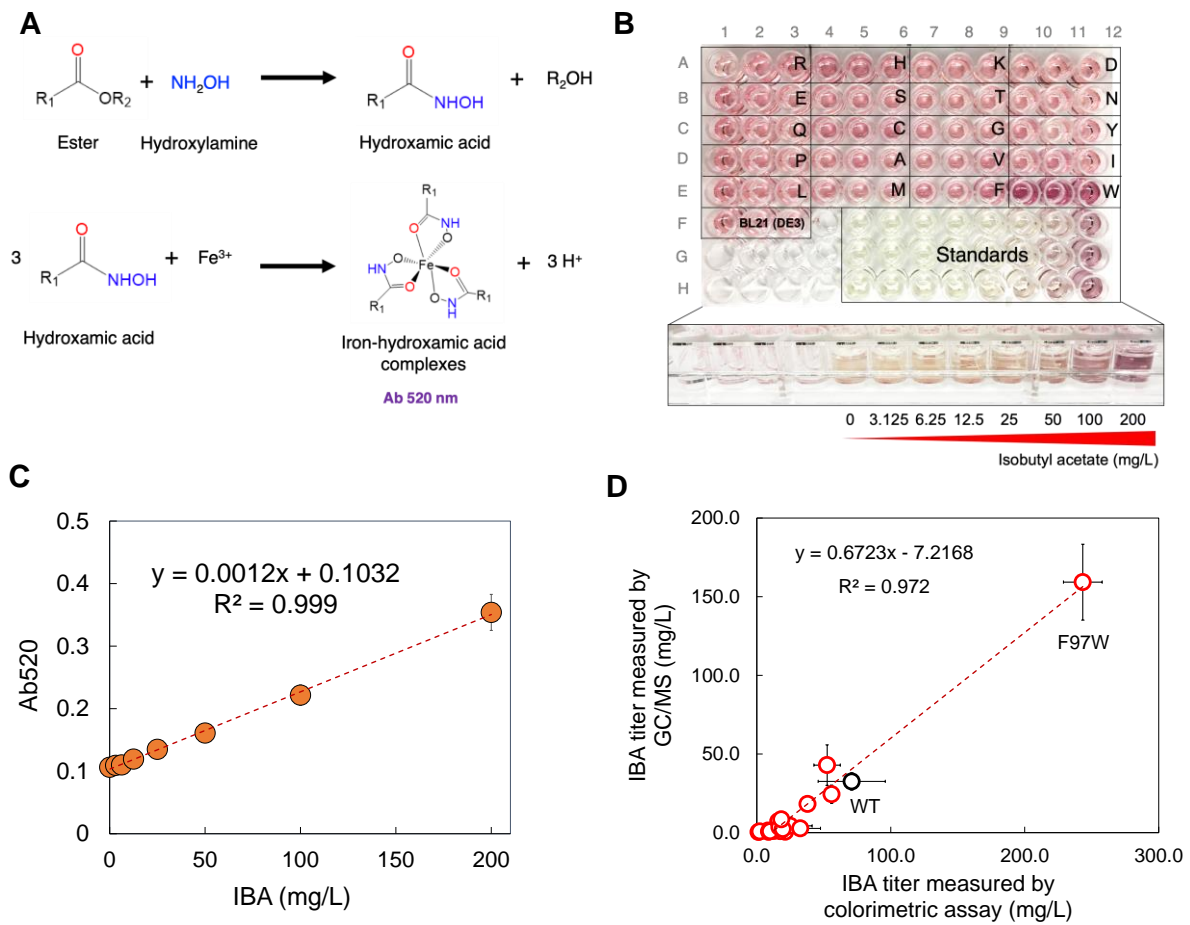

550

551

552

553 **Figure 4**

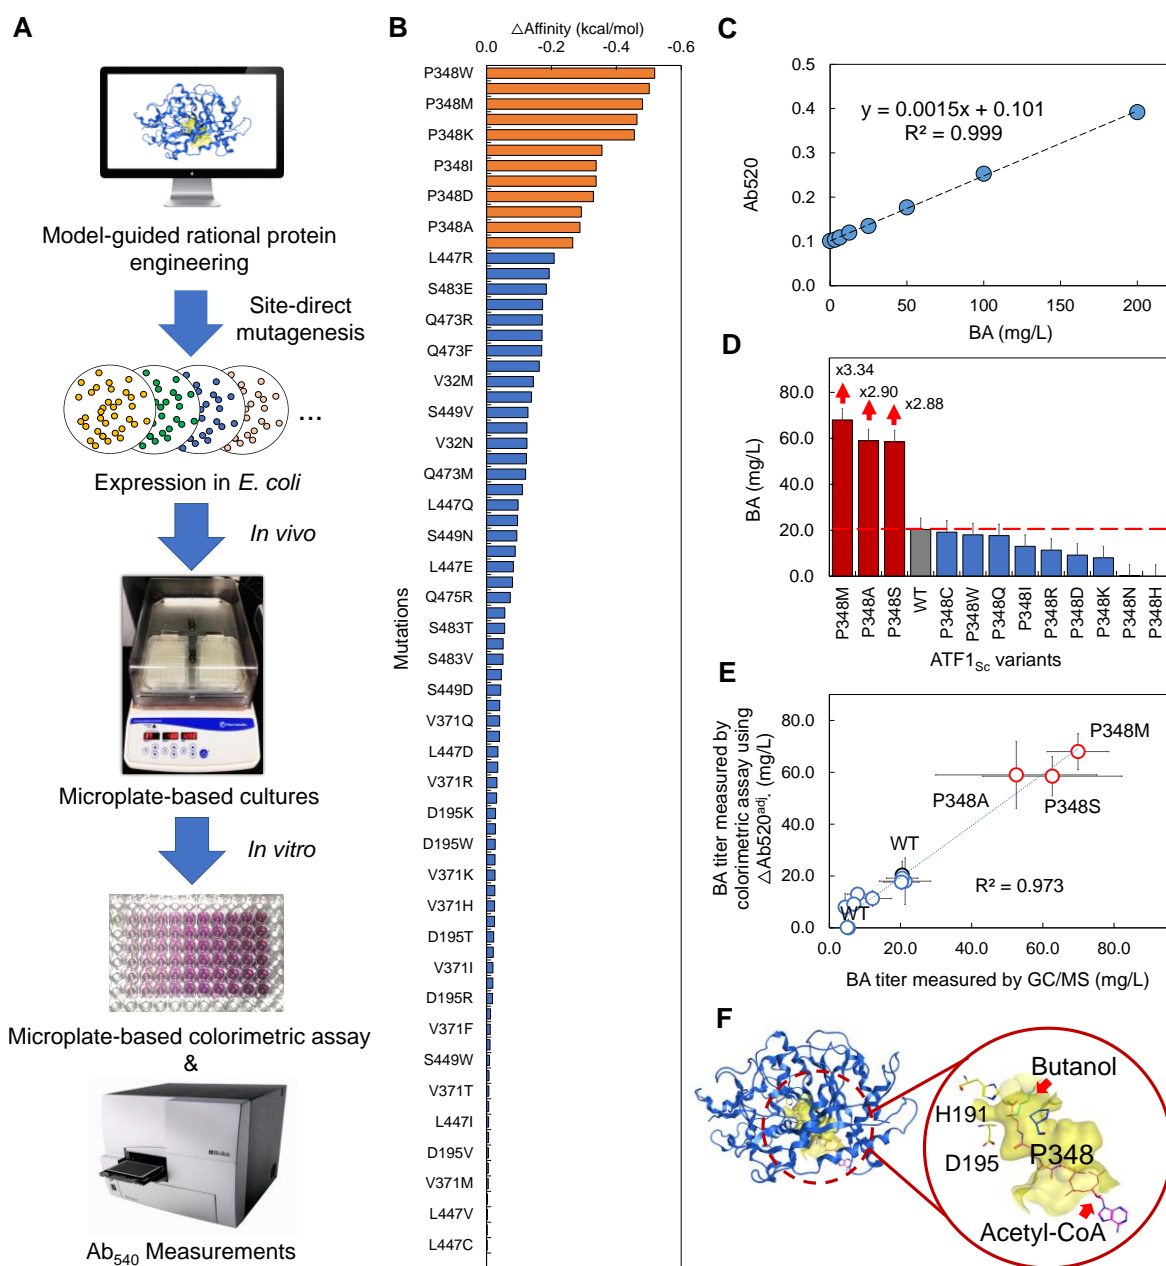

554

555

556
